# Supplementary material for: Modeling the effect of reduced traffic due to COVID-19 measures on air quality using a chemical transport model: impacts on the Po Valley and the Swiss Plateau regions
Source: PubMed Central journal article supplement — Environ Sci Atmos. 2021 Jul 12;1(5):228–40. doi: 10.1039/d1ea00036e (PMC8296577; doi:10.1039/d1ea00036e), 2021-07-12
Supplement: EA-001-D1EA00036E-s001.pdf [file EA-001-D1EA00036E-s001.pdf]

## Supplementary material

Table S1: Measurements sites included from the ARPAE (Italy) and NABEL (Switzerland) networks\*.

| Station name         | Region | Longitude (deg) | Latitude (deg) | Station type |
|----------------------|--------|-----------------|----------------|--------------|
| Flaminia             | ARPAE  | 12,6            | 44,1           | urban        |
| Marecchia            | ARPAE  | 12,6            | 44,1           | urban        |
| San Clemente         | ARPAE  | 12,6            | 43,9           | rural        |
| San Leo              | ARPAE  | 12,4            | 43,9           | rural        |
| Cittadella           | ARPAE  | 10,3            | 44,8           | urban        |
| Montebello           | ARPAE  | 10,3            | 44,8           | urban        |
| Badia                | ARPAE  | 10,3            | 44,7           | rural        |
| Saragat              | ARPAE  | 10,4            | 44,9           | suburban     |
| Castellarano         | ARPAE  | 10,7            | 44,5           | suburban     |
| S. Lazzaro           | ARPAE  | 10,7            | 44,7           | urban        |
| Febbio               | ARPAE  | 10,4            | 44,3           | rural        |
| S. Rocco             | ARPAE  | 10,7            | 44,9           | rural        |
| Timavo               | ARPAE  | 10,6            | 44,7           | urban        |
| Giardini             | ARPAE  | 10,9            | 44,6           | urban        |
| Remesina             | ARPAE  | 10,9            | 44,8           | suburban     |
| Parco Ferrari        | ARPAE  | 10,9            | 44,7           | urban        |
| San Francesco        | ARPAE  | 10,8            | 44,5           | urban        |
| Gavello              | ARPAE  | 11,2            | 44,9           | rural        |
| Parco Edilcarani     | ARPAE  | 10,8            | 44,5           | urban        |
| Lugagnano            | ARPAE  | 9,8             | 44,8           | suburban     |
| Giordani-Farnese     | ARPAE  | 9,7             | 45,0           | urban        |
| Besenzone            | ARPAE  | 10,0            | 45,0           | rural        |
| Parco Montecucco     | ARPAE  | 9,7             | 45,0           | urban        |
| Corte Brugnatella    | ARPAE  | 9,4             | 44,7           | rural        |
| Parco Resistenza     | ARPAE  | 12,0            | 44,2           | urban        |
| Roma                 | ARPAE  | 12,1            | 44,2           | urban        |
| Franchini-Angeloni   | ARPAE  | 12,2            | 44,1           | urban        |
| Savignano            | ARPAE  | 12,4            | 44,1           | suburban     |
| Savignano Di Rigo    | ARPAE  | 12,2            | 43,9           | rural        |
| De Amicis            | ARPAE  | 11,7            | 44,4           | urban        |
| Giardini Margherita  | ARPAE  | 11,4            | 44,5           | urban        |
| Porta San Felice     | ARPAE  | 11,3            | 44,5           | urban        |
| San Lazzaro          | ARPAE  | 11,4            | 44,5           | urban        |
| San Pietro Capofiume | ARPAE  | 11,6            | 44,7           | rural        |
| Via Chiarini         | ARPAE  | 11,3            | 44,5           | suburban     |
| Castelluccio         | ARPAE  | 10,9            | 44,1           | rural        |
| Isonzo               | ARPAE  | 11,6            | 44,8           | urban        |
| Gherardi             | ARPAE  | 12,0            | 44,8           | rural        |

|                     |       |      |      |            |
|---------------------|-------|------|------|------------|
| Cento               | ARPAE | 11,3 | 44,7 | suburban   |
| Villa Fulvia        | ARPAE | 11,6 | 44,8 | urban      |
| Ostellato           | ARPAE | 11,9 | 44,7 | rural      |
| Zalamella           | ARPAE | 12,2 | 44,4 | urban      |
| Caorle              | ARPAE | 12,2 | 44,4 | urban      |
| Ballirana           | ARPAE | 12,0 | 44,5 | rural      |
| Delta Cervia        | ARPAE | 12,3 | 44,3 | suburban   |
| Parco Bertozzi      | ARPAE | 11,9 | 44,3 | urban      |
| Bern-Bollwerk       | NABEL | 7,4  | 47,0 | urban      |
| Lausanne-César-Roux | NABEL | 6,6  | 46,5 | urban      |
| Lugano-Università   | NABEL | 9,0  | 46,0 | urban      |
| Zürich-Kaserne      | NABEL | 8,5  | 47,4 | urban      |
| Basel-Binningen     | NABEL | 7,6  | 47,5 | suburban   |
| Dübendorf-Empa      | NABEL | 8,6  | 47,4 | suburban   |
| Härkingen-A1        | NABEL | 7,8  | 47,3 | ruralA     |
| Sion-Aéroport-A9    | NABEL | 7,3  | 46,2 | ruralAuto  |
| Magadino-Cadenazzo  | NABEL | 8,9  | 46,2 | ruralU1000 |
| Payerne             | NABEL | 6,9  | 46,8 | ruralU1000 |
| Tänikon             | NABEL | 8,9  | 47,5 | ruralU1000 |
| Beromünster         | NABEL | 8,2  | 47,2 | ruralU1000 |
| Chaumont            | NABEL | 7,0  | 47,0 | ruralO1000 |
| Rigi-Seebodenalp    | NABEL | 8,5  | 47,1 | ruralO1000 |
| Davos-Seehornwald   | NABEL | 9,9  | 46,8 | ruralO1000 |
| Jungfrauoch         | NABEL | 8,0  | 46,5 | mountain   |

\* Station classified as mountain and above 1000 meters where not included in the analysis. *RuralA* refers to rural sites close to highways, whereas *ruralU1000* and *ruralO1000* refers to rural sites below and above 1000 meters, respectively.

Table S2: Definition of statistical metrics for model performance evaluation.  $M_i$  and  $O_i$  stand for modeled and observed values, respectively, and  $N$  is the total number of paired values. The Pearson correlation coefficient is calculated for the temporal variability.

| Metric                              | Definition                                                                                                                                         |
|-------------------------------------|----------------------------------------------------------------------------------------------------------------------------------------------------|
| Mean Bias (MB)                      | $MB = \frac{1}{N} \sum_{i=1}^N (M_i - O_i)$                                                                                                        |
| Mean gross error (MGE)              | $MGE = \frac{1}{N} \sum_{i=1}^N  M_i - O_i $                                                                                                       |
| Mean gross error (MGE)              | $RMSE = \sqrt{\frac{1}{N} \sum_{i=1}^N (M_i - O_i)^2}$                                                                                             |
| Index of agreement (IOA)            | $IOA = 1 - \frac{N \cdot RMSE^2}{\sum_{i=1}^N ( M_i - \bar{O}  +  O_i - \bar{O} )^2}$                                                              |
| Pearson correlation coefficient (r) | $r = \frac{\sum_{i=1}^N (M_i - \bar{M}) \cdot (O_i - \bar{O})}{\sqrt{\sum_{i=1}^N (M_i - \bar{M})^2} \cdot \sqrt{\sum_{i=1}^N (O_i - \bar{O})^2}}$ |
| Mean fractional bias (MFB)          | $MFB = \frac{1}{N} \sum_{i=1}^N \frac{2 \cdot (M_i - O_i)}{M_i + O_i}$                                                                             |
| Mean fractional error (MFE)         | $MFE = \frac{1}{N} \sum_{i=1}^N \frac{2 \cdot  (M_i - O_i) }{M_i + O_i}$                                                                           |
| Absolute change                     | (CAMx-COVID – CAM-BAU)                                                                                                                             |
| Relative change                     | ((CAMx-COVID – CAM-BAU)/CAMx-BAU)                                                                                                                  |

Table S3: Performance criteria and goals for model results (Boylan and Russell, 2006; EPA, 2007).

| Parameter         | Metric | Criteria | Goal    |
|-------------------|--------|----------|---------|
| PM <sub>2.5</sub> | MFB    | ≤ ±60 %  | ≤ ±30 % |
|                   | MFE    | ≤ 75 %   | ≤ 50 %  |
| O <sub>3</sub>    | MFB    | ≤ ±30 %  | ≤ ±15 % |
|                   | MFE    | ≤ 45 %   | ≤ 30 %  |

Table S4: Chemical reactions tagged with the Process analysis tool (Ramboll, 2018).

| Reactions (ppb h <sup>-1</sup> )                | Description                                                              |
|-------------------------------------------------|--------------------------------------------------------------------------|
| HNO <sub>3</sub> -prod                          | Nitric acid total production rate                                        |
| ·NO <sub>3</sub> -prod                          | Nitrate radical total production rate                                    |
| N <sub>2</sub> O <sub>5</sub> wH <sub>2</sub> O | Nitric acid production rate via heterogeneous reaction                   |
| NO <sub>2</sub> wOH                             | Nitric acid production rate via NO <sub>2</sub> oxidation by ·OH radical |
| OHwVOC                                          | VOC reactions rate with ·OH radical                                      |
| NO <sub>3</sub> wVOC                            | VOC reactions rate with ·NO <sub>3</sub> radical                         |
| ·OH-prod                                        | Total production rate of ·OH radical                                     |
| ·HO <sub>2</sub> -prod                          | Total production rate of ·HO <sub>2</sub> radical                        |
| ·OH-photolysis                                  | ·OH from photolysis processes                                            |
| O( <sup>1</sup> D)+H <sub>2</sub> O             | ·OH from reactions of oxygen in the excited states with water            |
| O <sub>3</sub> +VOCs                            | ·OH from the reactions of O <sub>3</sub> with VOCs                       |

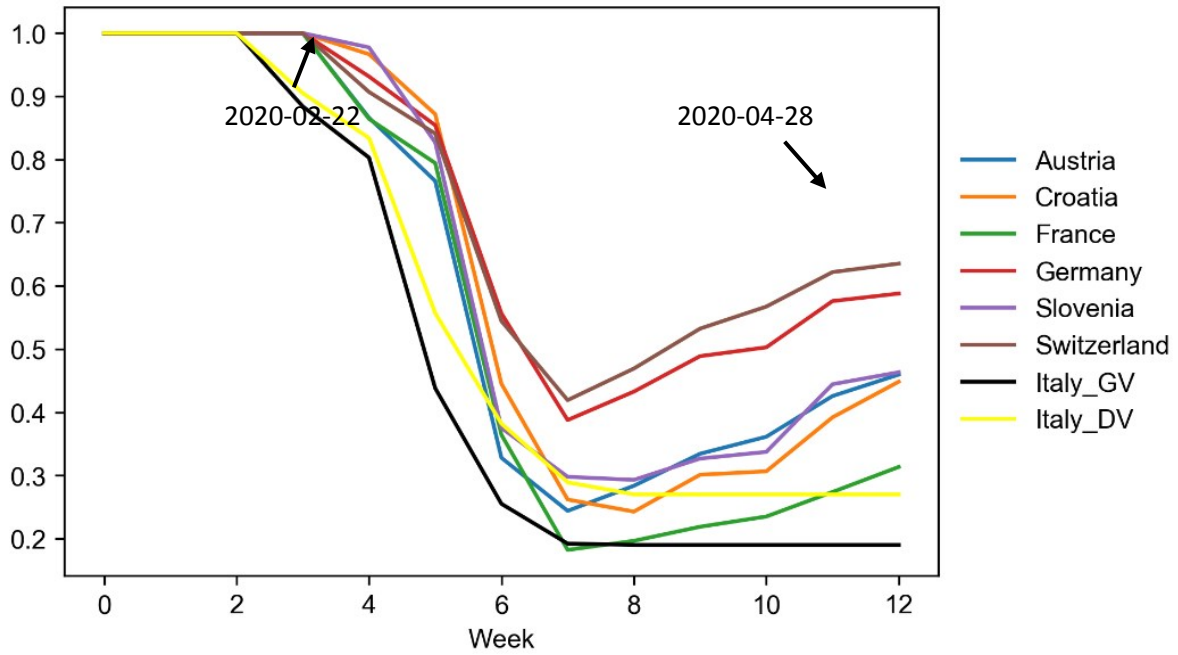

Figure S1: Scaling factors for emissions in CAMx-LOCK scenario. GV and DV represent gasoline and diesel vehicles, respectively.

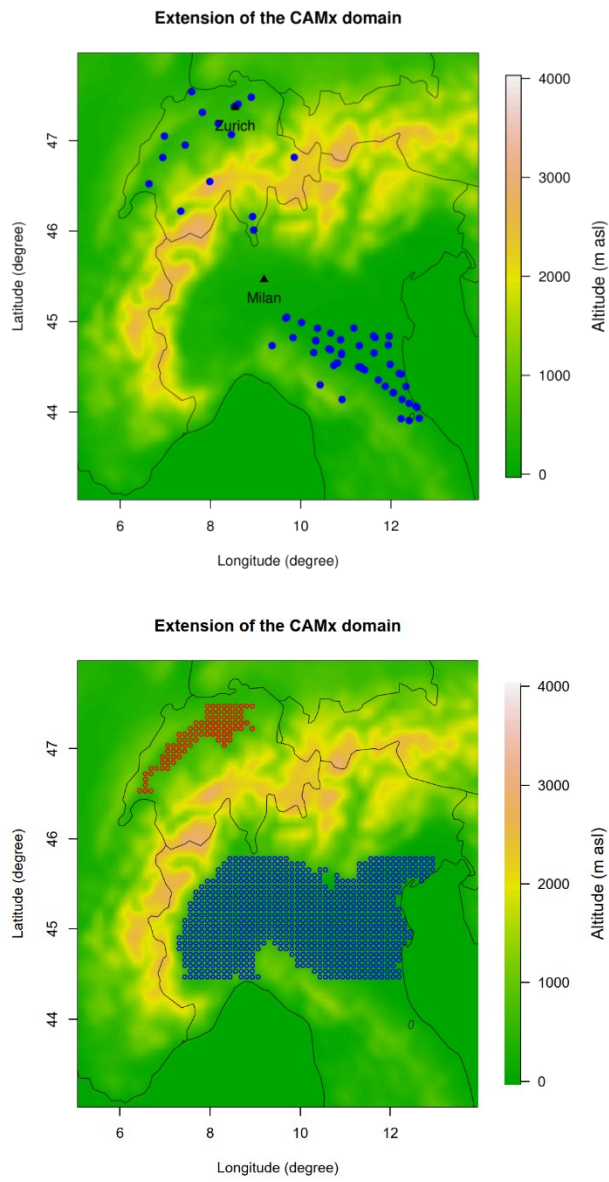

Figure S2: Locations of the measurement sites (ARPAE and NABEL stations) included in the analysis (left) and model cells used to retrieve the Swiss Plateau (red circles) and Po Valley (blue circles) regions.

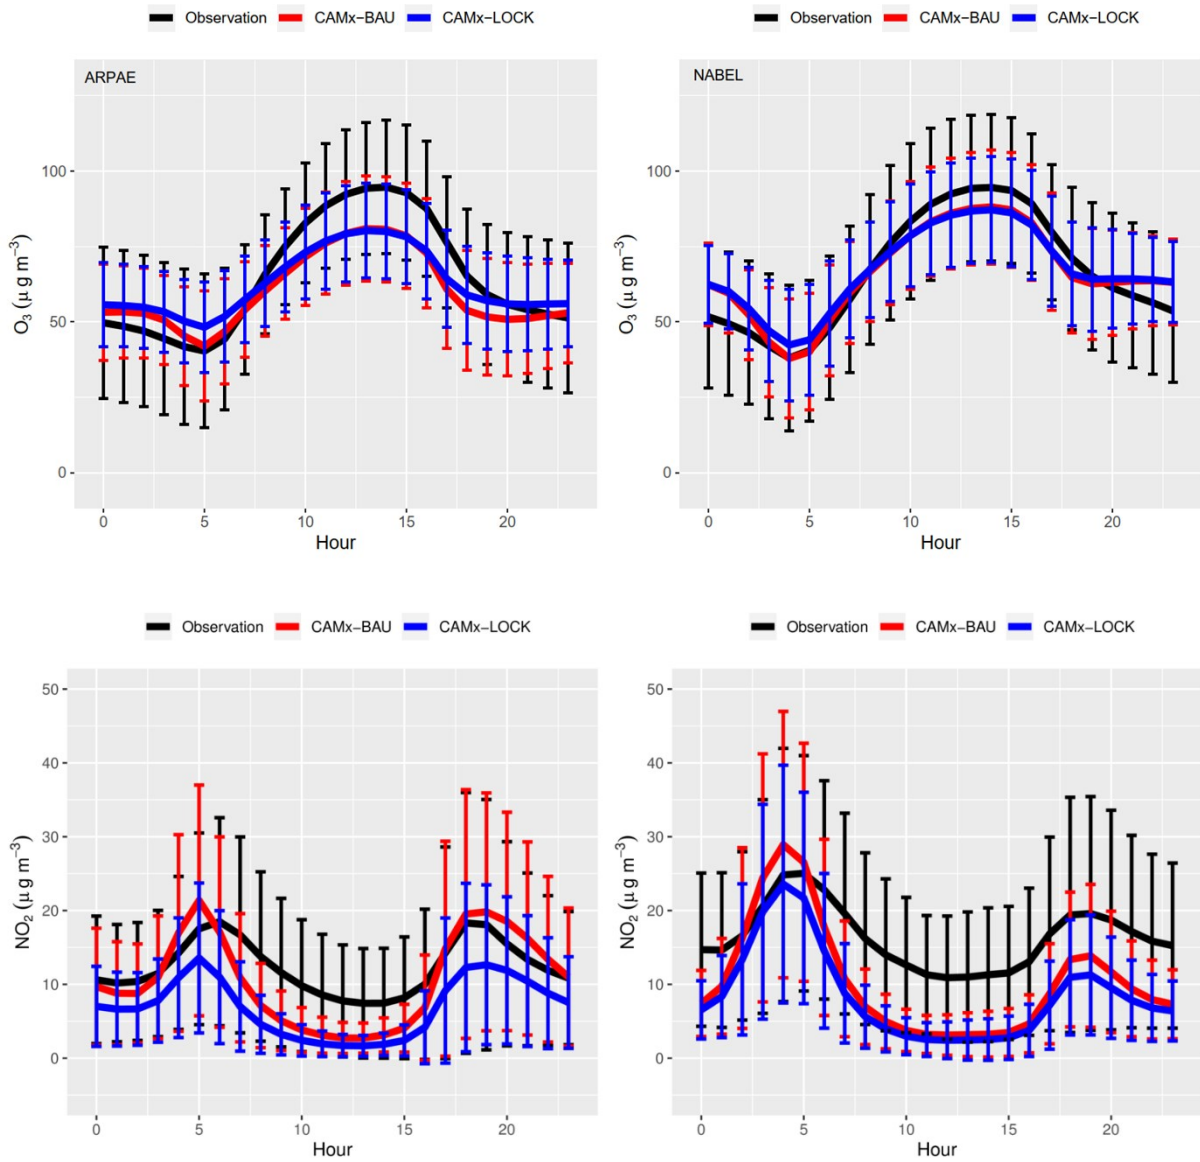

Figure S3: Diurnal cycles (UTC) of O<sub>3</sub> (top panel) and NO<sub>2</sub> (bottom panel) concentrations for the ARPAE (left panels) and NABEL stations (right panels) (8 March – 27 April 2020).

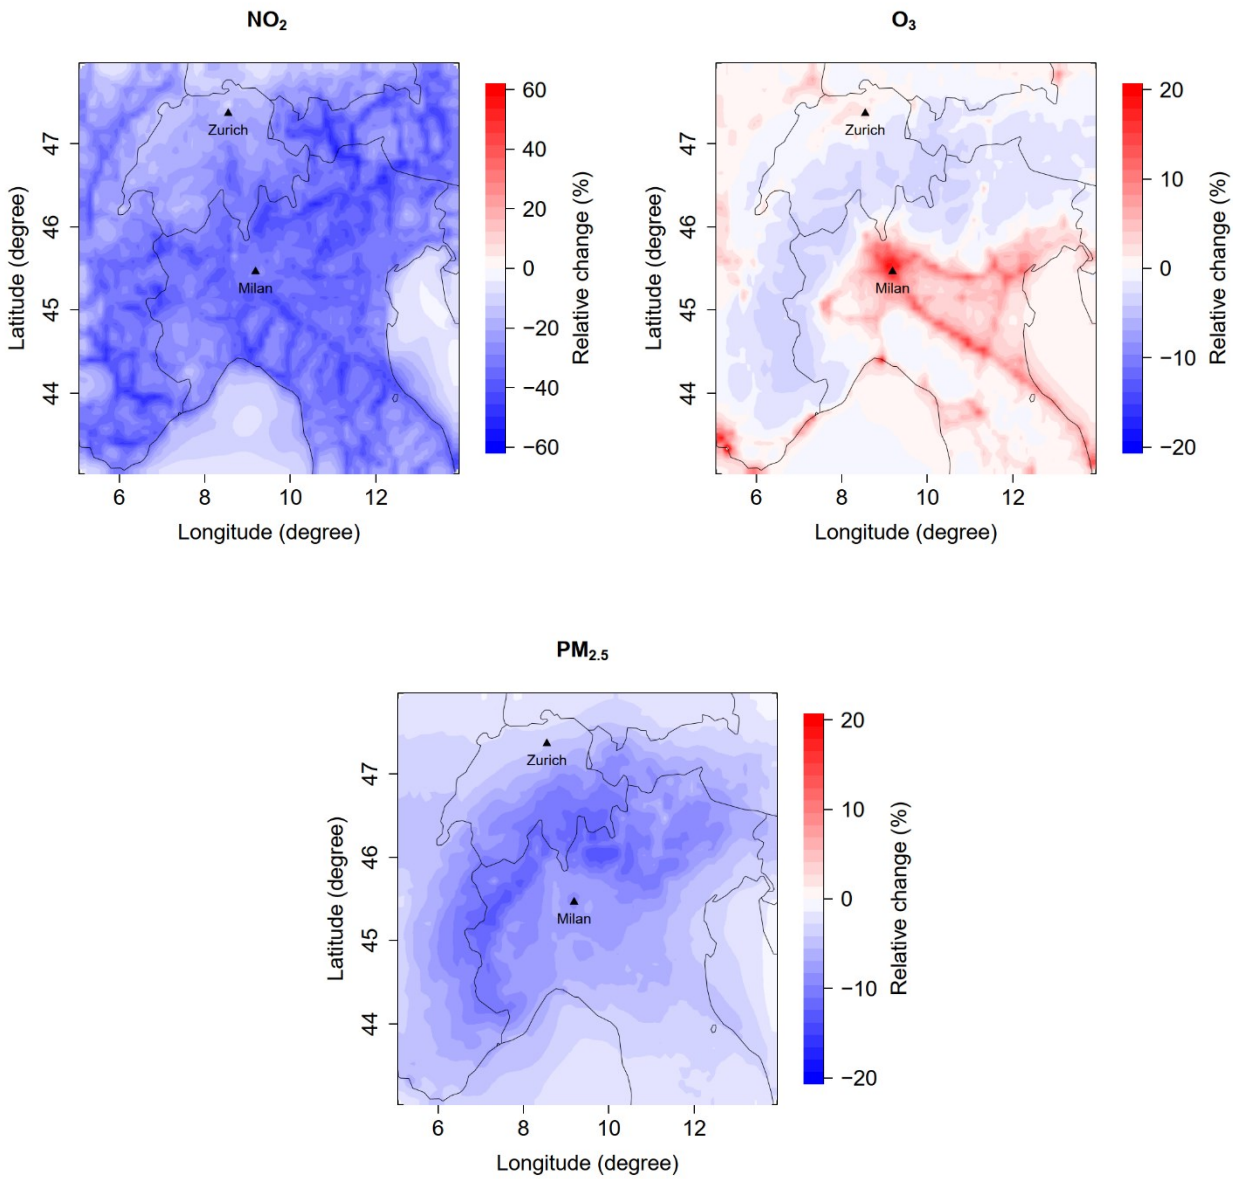

Figure S4: Modeled  $\text{NO}_2$ ,  $\text{O}_3$ , and  $\text{PM}_{2.5}$  average relative changes over the CAMx domain (8 March – 27 April 2020).



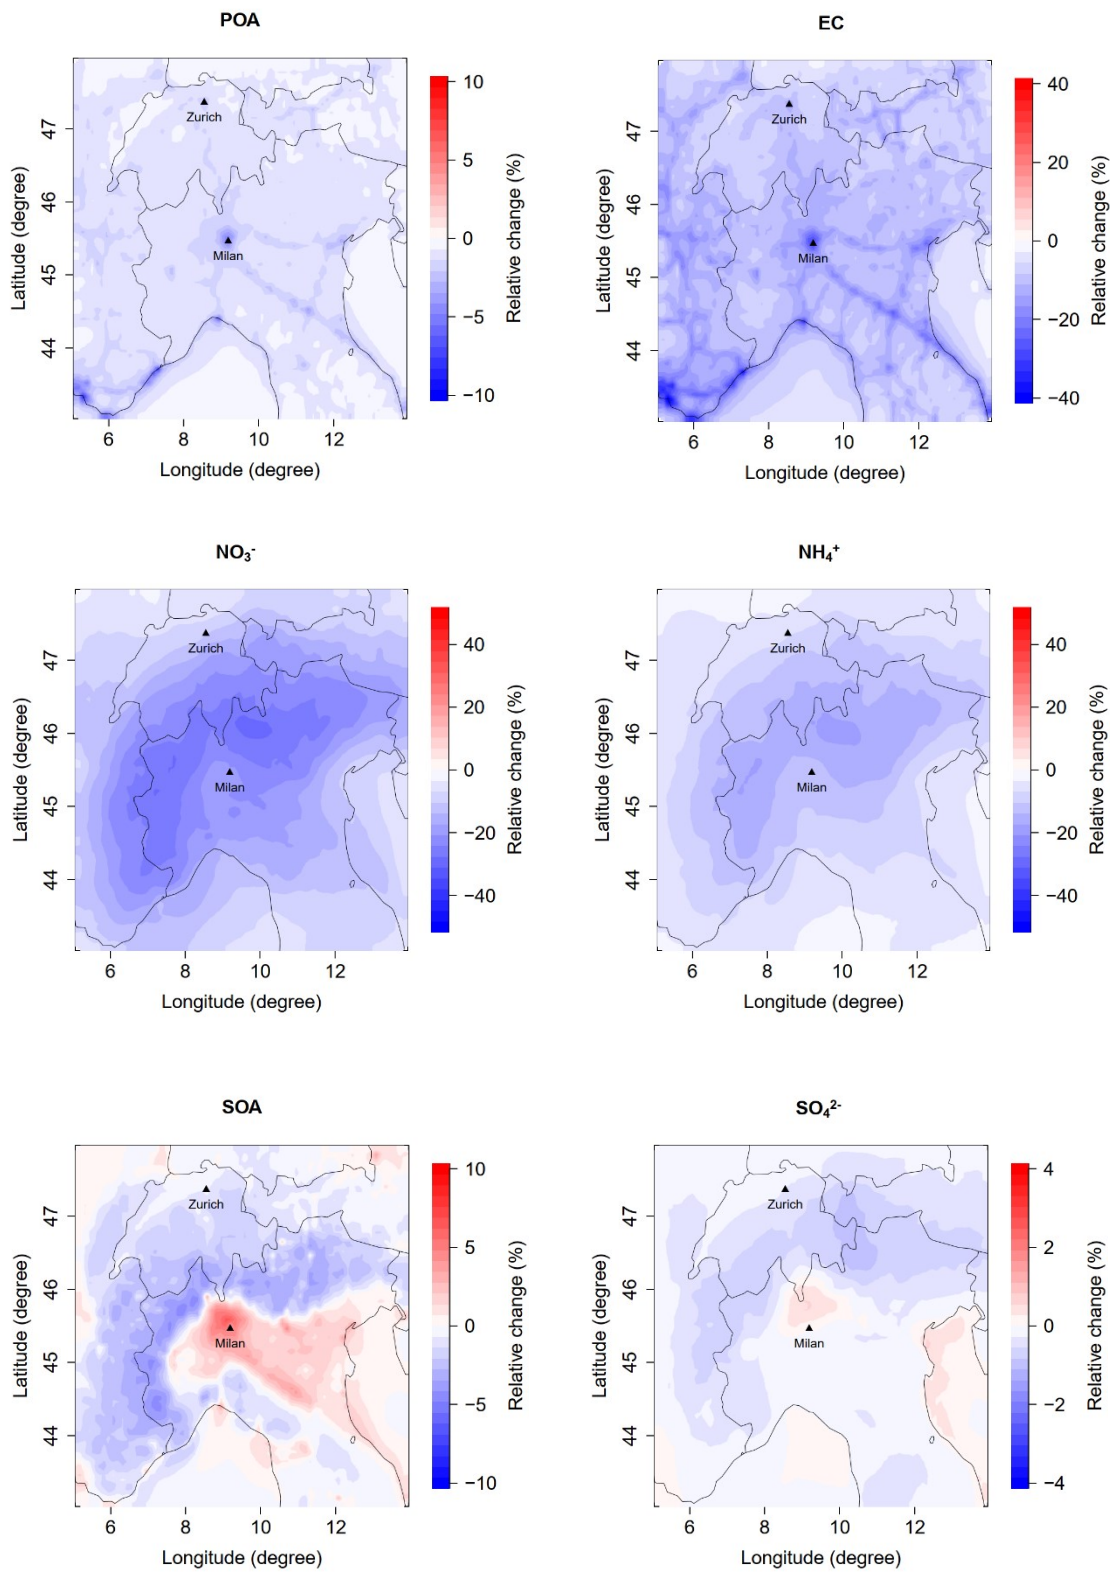

Figure S5: Relative changes in POA, EC, NO<sub>3</sub><sup>-</sup>, NH<sub>4</sub><sup>+</sup>, SO<sub>4</sub><sup>2-</sup> and SOA concentrations over the CAMx domain (8 March – 27 April 2020).

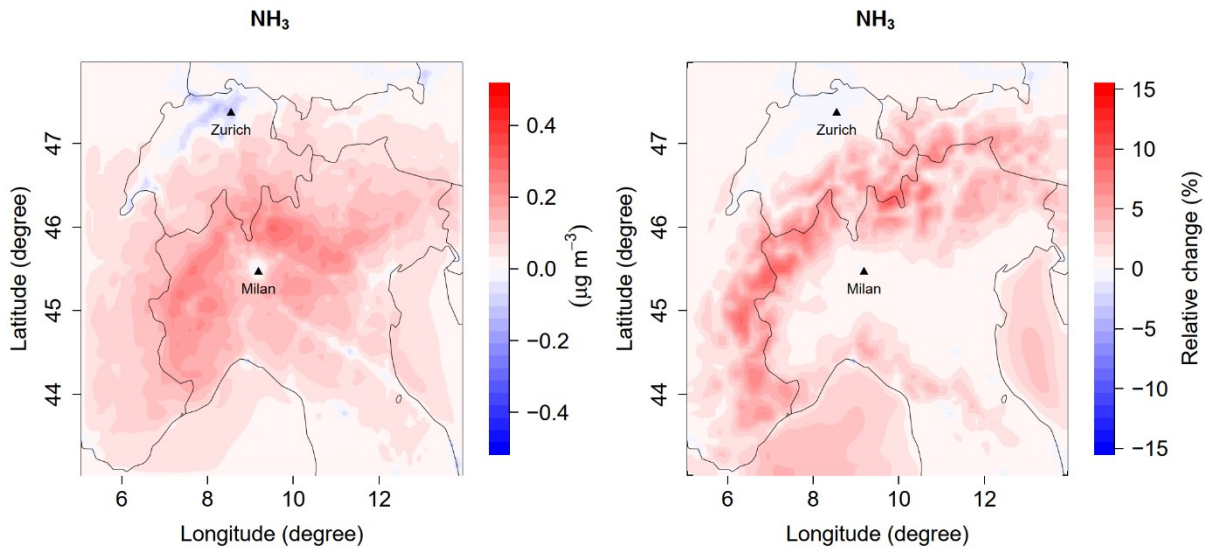

Figure S6: Modeled  $\text{NH}_3$  absolute changes (i.e. CAMx-LOCK – CAMx-BAU, left-panel) and relative changes, right-panel (8 March – 27 April 2020).

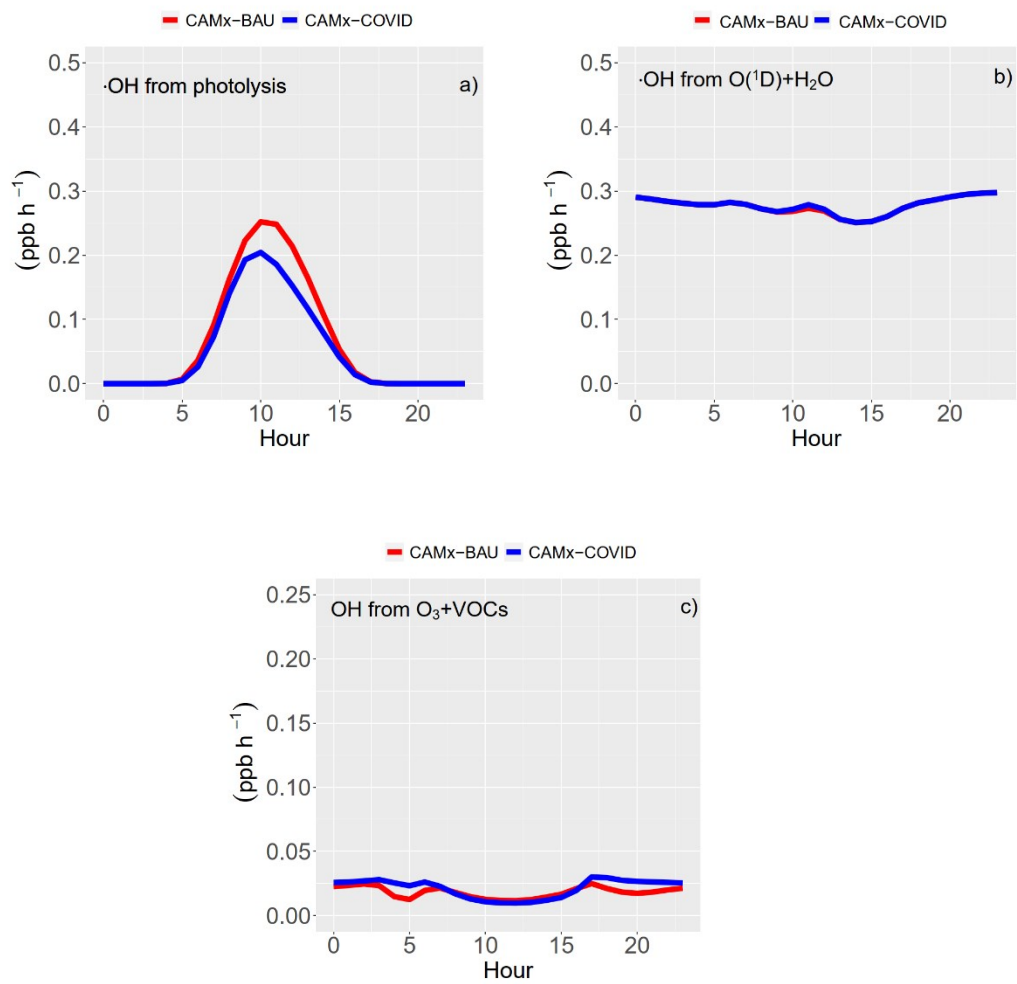

Figure S7: Direct sources of  $\cdot\text{OH}$  radicals in the CAMx-BAU and CAMx-COVID scenarios.  $\cdot\text{OH}$ -photolysis (a) includes the photolysis of HONO,  $\text{HNO}_3$ , and  $\text{H}_2\text{O}_2$  as well as methylhydroperoxide, peroxyacetic, higher peroxydicarboxylic acids and higher organic peroxide. Units are in  $\text{ppb h}^{-1}$ .

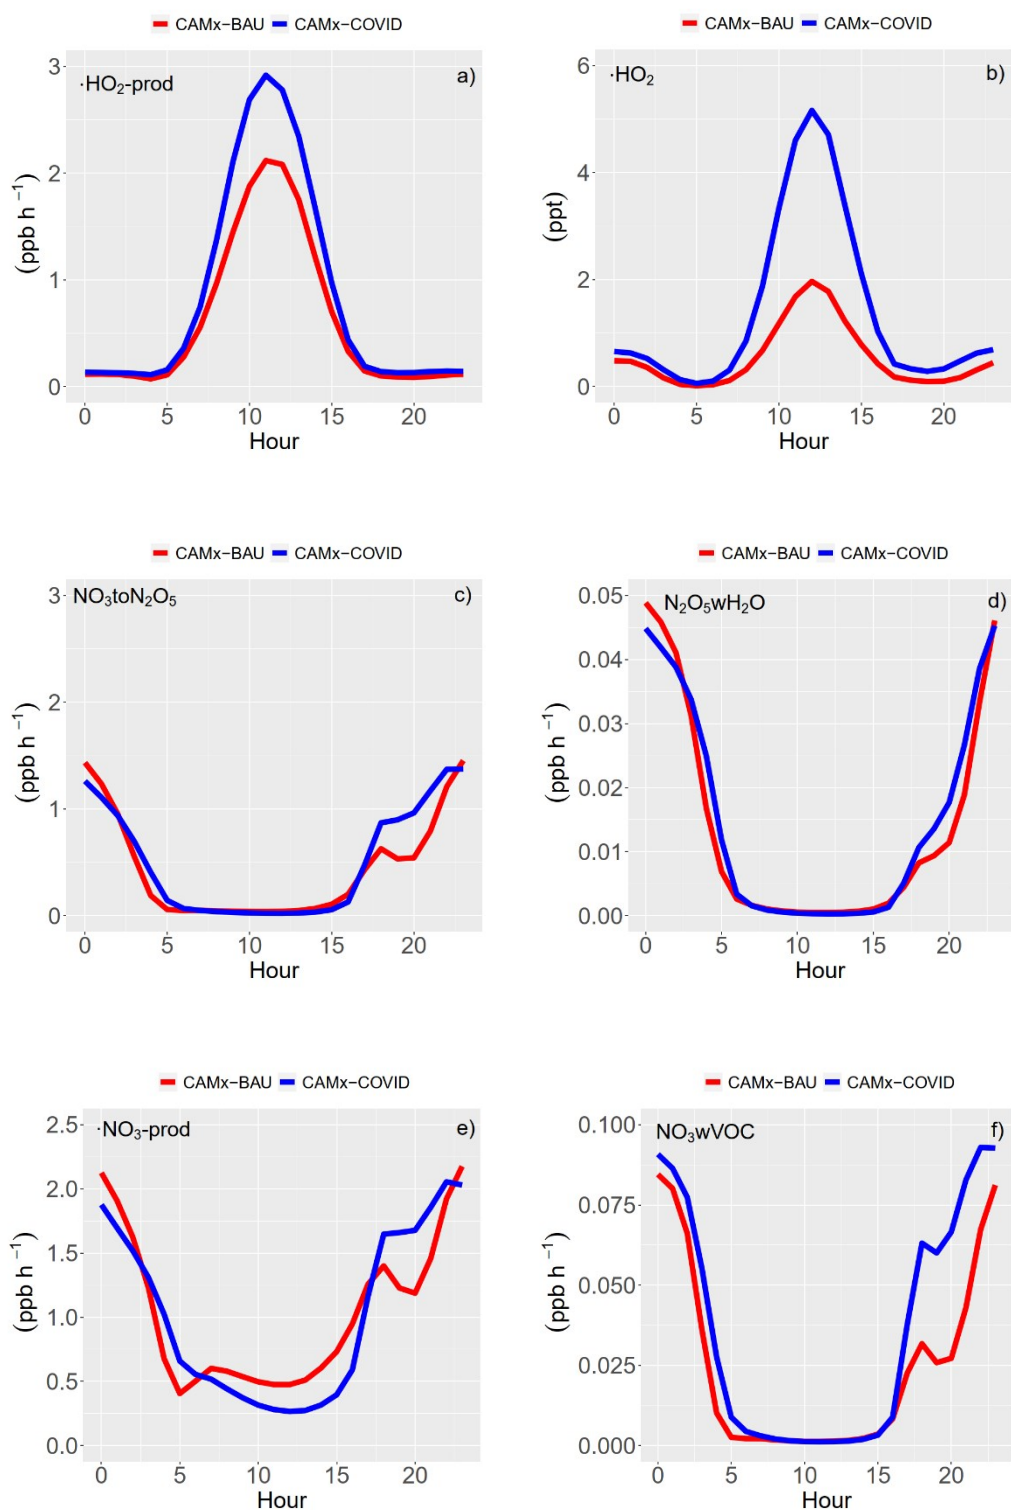

Figure S8: Diurnal variations of  $\cdot\text{HO}_2\text{-prod}$  (a),  $\cdot\text{HO}_2$  (b),  $\text{NO}_3\text{toN}_2\text{O}_5$  (c),  $\text{N}_2\text{O}_5\text{wH}_2\text{O}$  (d),  $\cdot\text{NO}_3\text{-prod}$  (e) and  $\text{NO}_3\text{wVOC}$  (f) over the “Greater Milan” area (8 March – 27 April 2020). Units are in ppb h<sup>-1</sup> for the reactions and in ppt for the  $\cdot\text{OH}_2$  concentrations.

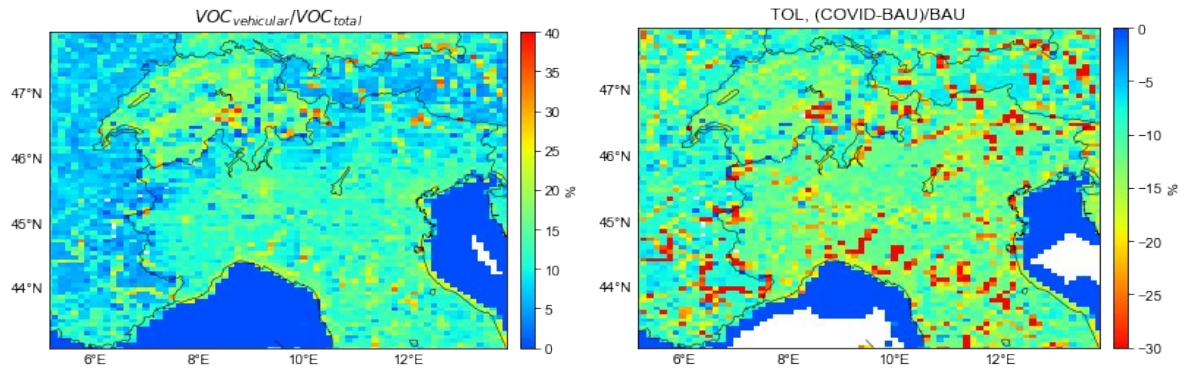

Figure S9: Contribution of vehicular VOCs to the total VOCs emissions (left panel), and relative changes in toluene emissions between the BAU and the COVID scenarios (right panel) due to the reduced traffic emissions.
